# Supplementary material
Source: Springer Nature journal article supplement (https://www.springermedizin.de/resource/supplementary/12903_2014_483_MOESM2_ESM.pdf/9516790)
Supplement: MOESM2 [file 9516790]

Enrollment

Assessed for eligibility (n=11)

Mechanical removal of dental plaque of the left and right mandibular premolars (n=11)

Randomized (n=11)

Cease of tooth-brushing

Allocation

Control group teeth

aPDT group teeth

aPDT procedure  
(six times)

1st day-evening ⇨

2nd day-morning ⇨

evening ⇨

3rd day-morning ⇨

evening ⇨

4th day-morning ⇨

Analysis

Analyzed in 4th day-evening (n=11)
